# Supplementary material for: Milk Fat Globule Membrane Supplementation in Formula-fed Rat Pups Improves Reflex Development and May Alter Brain Lipid Composition
Source: PubMed Central journal article supplement (PMC6189118; doi:10.1038/s41598-018-33603-8), 2018-10-15
Supplement: 41598_2018_33603_MOESM1_ESM.pdf [file 41598_2018_33603_MOESM1_ESM.pdf]

## Milk Fat Globule Membrane Supplementation in Formula-fed Rat Pups Improves Reflex Development and May Alter Brain Lipid Composition

Sara Moukarzel<sup>1</sup>, Roger A. Dyer<sup>2</sup>, Cyrielle Garcia<sup>4\*</sup>, Alejandra M. Wiedeman<sup>4\*</sup>, Guilaine Boyce<sup>4</sup>, Joanne Weinberg<sup>3</sup>, Bernd O. Keller<sup>4</sup>, Rajavel Elango<sup>4,5\*</sup> and Sheila M. Innis<sup>4‡</sup>

**Supplementary Table 1.** Total body and brain weights of mother-reared group, group fed formula with MFGM (MFGM+) and group fed formula without MFGM (MFGM-)

|                       |                    | Mother-reared<br><i>n</i> =6 | MFGM+<br><i>n</i> =7 | MFGM-<br><i>n</i> =7 |
|-----------------------|--------------------|------------------------------|----------------------|----------------------|
| <b>Days postnatal</b> |                    |                              |                      |                      |
| d5                    |                    |                              |                      |                      |
|                       | Body               | 16.0 ± 0.47                  | 14.8 ± 0.69          | 14.4 ± 0.29          |
|                       | Brain <sup>1</sup> | 0.54 ± 0.04                  | -                    | -                    |
| d10                   |                    |                              |                      |                      |
|                       | Body               | 24.3 ± 1.44                  | 21.1 ± 0.12          | 20.9 ± 1.15          |
|                       | Brain              | 0.80 ± 0.04                  | 0.68 ± 0.02          | 0.88 ± 0.04          |
| d13                   |                    |                              |                      |                      |
|                       | Body               | NA                           | 34.8 ± 1.90          | 30.3 ± 6.54          |
|                       | Brain              |                              | 0.92 ± 0.01          | 0.93 ± 0.02          |
| d15                   |                    |                              |                      |                      |
|                       | Body               | 41 ± 1.56                    | 36.4 ± 2.98          | 39.1 ± 4.28          |
|                       | Brain              | 1.25 ± 0.18                  | 0.94 ± 0.03          | 1.03 ± 0.02          |
| d18                   |                    |                              |                      |                      |
|                       | Body               | 38.9 ± 2.54                  | 37.9 ± 0.45          | 36.1 ± 2.68          |
|                       | Brain              | 0.92 ± 0.01                  | 1.05 ± 0.03          | 1.00 ± 0.02          |

means ± SEM in g; <sup>1</sup> values correspond to cerebrum wet weight

NA, not available; No significant difference between groups using ANOVA.

**Supplementary Table 2.** Maturation age (days) for physical features and reflexes of mother-reared rats, rats fed formula with MFGM (MFGM+ group) and rats fed formula without MFGM (MFGM- group)

|                          | Mother-reared ( <i>n</i> =6) | MFGM+ ( <i>n</i> =7)       | MFGM- ( <i>n</i> =7)     |
|--------------------------|------------------------------|----------------------------|--------------------------|
| <b>Physical features</b> |                              |                            |                          |
| Ear unfolding            | 8.33 ± 0.52 <sup>a</sup>     | 9 <sup>b</sup>             | 9 <sup>b</sup>           |
| Incisor eruption         | 8.67 ± 0.82 <sup>a</sup>     | 8.20 ± 0.84 <sup>a</sup>   | 8.14 ± 0.69 <sup>a</sup> |
| Eye opening              | 13                           | 13                         | 13                       |
| <b>Reflexes</b>          |                              |                            |                          |
| Palmar grasp             | 5                            | 6                          | 6                        |
| Negative geotaxis        | 7.00 ± 0.89 <sup>a</sup>     | 6.20 ± 0.45 <sup>a,b</sup> | 6.00 ± 0.58 <sup>b</sup> |
| Cliff Avoidance          | 6 <sup>a</sup>               | 5.40 ± 0.55 <sup>b</sup>   | 5 <sup>c</sup>           |
| Ear twitch               | 6.33 ± 0.52 <sup>a</sup>     | 8.71 ± 0.76 <sup>b</sup>   | 9.86 ± 1.07 <sup>c</sup> |
| Eyelid twitch            | 6 <sup>a</sup>               | 6.20 ± 0.45 <sup>a</sup>   | 6.86 ± 0.38 <sup>b</sup> |

Values are mean ± SEM. Differences between groups were analyzed by ANOVA, followed by post hoc LSD test. Values within a row with different letters are significantly different from each other ( $P < 0.05$ ).

**Supplementary Table 3.** Differences in selected brain lipids between mother-reared rats, rats fed formula with MFGM (MFGM+ group) and rats fed formula without MFGM (MFGM- group)

|                       | d5                         | d10                        | d13                      | d15         | d18                      |
|-----------------------|----------------------------|----------------------------|--------------------------|-------------|--------------------------|
|                       | <i>µg/50 mg wet weight</i> |                            |                          |             |                          |
| <b>PE</b>             |                            |                            |                          |             |                          |
| Mother-reared         | 280 ± 56.9                 | 282 ± 33.6                 | NA                       | 473 ± 31.5  | 521 ± 69.4*              |
| MFGM+                 | -                          | 366 ± 62.8                 | 397 ± 48.3               | 493 ± 107   | 508 ± 49.1               |
| MFGM-                 | -                          | 372 ± 135                  | 452 ± 54.6               | 478 ± 131   | 612 ± 58.4               |
| <b>PI</b>             |                            |                            |                          |             |                          |
| Mother-reared         | 74.5 ± 15.6                | 56.1 ± 7.28                | NA                       | 88.9 ± 1.17 | 106 ± 20.3               |
| MFGM+                 | -                          | 71.3 ± 15.1                | 81.6 ± 6.38              | 91.0 ± 34.4 | 92.0 ± 19.7              |
| MFGM-                 | -                          | 70.6 ± 23.0                | 84.0 ± 6.46              | 89.8 ± 27.9 | 120 ± 15.9               |
| <b>PS</b>             |                            |                            |                          |             |                          |
| Mother-reared         | 50.1 ± 8.17                | 36.3 ± 8.79                | NA                       | 55.3 ± 0.57 | 59.1 ± 11.8 <sup>a</sup> |
| MFGM+                 | -                          | 48.3 ± 7.09                | 54.3 ± 3.11              | 62.2 ± 32.5 | 67.8 ± 15.6 <sup>a</sup> |
| MFGM-                 | -                          | 57.7 ± 18.4                | 54.1 ± 11.8              | 71.8 ± 19.6 | 98.2 ± 11.3 <sup>b</sup> |
| <b>PC</b>             |                            |                            |                          |             |                          |
| Mother-reared         | 454 ± 99.1                 | 431 ± 51                   | NA                       | 631 ± 59.2  | 657 ± 73.5               |
| MFGM+                 | -                          | 510 ± 71.2                 | 580 ± 59.7               | 621 ± 92.9  | 594 ± 65.7               |
| MFGM-                 | -                          | 515 ± 212                  | 526 ± 56.5               | 578 ± 120   | 649 ± 53.7               |
| <b>Sph</b>            |                            |                            |                          |             |                          |
| Mother-reared         | 30.3 ± 12.6                | 42.1 ± 11.5 <sup>a</sup>   | NA                       | 60.8 ± 5.29 | 44.7 ± 8.22              |
| MFGM+                 | -                          | 34.3 ± 10.1 <sup>a,b</sup> | 29.4 ± 5.39              | 42.3 ± 9.96 | 35.8 ± 11.0              |
| MFGM-                 | -                          | 16.3 ± 1.67 <sup>b</sup>   | 32.1 ± 12.4              | 31.7 ± 16.2 | 42.1 ± 11.5              |
| <b>F-Cholesterol</b>  |                            |                            |                          |             |                          |
| Mother-reared         | 165 ± 26.5                 | 225 ± 30.8                 | NA                       | 441 ± 47.8  | 501 ± 113                |
| MFGM+                 | -                          | 275 ± 45.7                 | 367 ± 49.1               | 414 ± 81.9  | 408 ± 36.5               |
| MFGM-                 | -                          | 210 ± 31.1                 | 408 ± 94.9               | 389 ± 119   | 499 ± 60.2               |
| <b>PC-to-PE ratio</b> |                            |                            |                          |             |                          |
| Mother-reared         | 1.56 ± 0.04                | 1.53 ± 0.02 <sup>a</sup>   | NA                       | 1.33 ± 0.04 | 1.27 ± 0.05 <sup>a</sup> |
| MFGM+                 | -                          | 1.40 ± 0.09 <sup>b</sup>   | 1.46 ± 0.04 <sup>a</sup> | 1.28 ± 0.11 | 1.17 ± 0.04 <sup>b</sup> |
| MFGM-                 | -                          | 1.37 ± 0.08 <sup>b</sup>   | 1.18 ± 0.19 <sup>b</sup> | 1.22 ± 0.11 | 1.06 ± 0.01 <sup>c</sup> |

Values are means ± SD; n=4-6 per group per time point; NA, not available. \* PE tends to be significantly different across three groups at d18, by ANOVA ( $P=0.052$ ). Values within a column at any particular time point with different letters are significantly different from each other, using ANOVA followed by post hoc LSD test ( $P < 0.05$ ). d, days postnatal; NA, not applicable; F, free; PE, phosphatidylethanolamine; PI, phosphatidylinositol; PS, phosphatidylserine; PC, phosphatidylcholine; Sph, sphingomyelin

**Supplementary Table 4.** Significant changes in brain metabolites between mother-reared rats (MR group), rats fed formula with MFGM (MFGM+ group) and rats fed formula without MFGM- group) at days 15 and 18 postnatal.

|                      | <b>Fold-differences</b> |                      |                         |
|----------------------|-------------------------|----------------------|-------------------------|
|                      | MR relative to MFGM+    | MR relative to MFGM- | MFGM+ relative to MFGM- |
| <b>At day 15</b>     |                         |                      |                         |
| Threonine            | 0.22*                   | 0.22*                | 0.95                    |
| Glycine              | 0.49*                   | 0.52*                | 1.07                    |
| Glutamine            | 0.52*                   | 0.60*                | 1.1                     |
| Alanine              | 0.36*                   | 0.36*                | 1.0                     |
| Inositol             | 0.60                    | 0.57*                | 0.95                    |
| <b>At day 18</b>     |                         |                      |                         |
| Threonine            | 0.55                    | 0.34*                | 0.63*                   |
| Glutamine            | 0.64*                   | 0.51*                | 0.79*                   |
| Inositol             | 0.64                    | 0.52*                | 0.81*                   |
| Glycerol-3-phosphate | 0.89                    | 0.32*                | 0.36*                   |

<sup>1</sup> differences between groups compared by ANOVA followed by post hoc LSD test. \* $P < 0.05$ .
